# Supplementary material for: Progressive advance and runout hazard assessment of a low-angle valley glacier in East Kunlun Mountains from multi-sensor satellite imagery analysis
Source: Copernicus journal article supplement (doi:10.5194/nhess-2021-57), 2021-03-10
Supplement: Supplementary file [file nhess-2021-57-AC2-supplement.pdf]

## Reply to the Comments of Referee #2

We would like to convey many thanks to the anonymous referee #2 for the thorough and constructive comments on our manuscript (Manuscript No.: nhess-2021-57). We have revised the paper carefully following the comments. Our item-by-item responses are provided below.

### General comments

The authors present a case-study of a low-angle valley glacier that has been advancing and is potentially destabilizing, and put this in the context of recent uptick of glacier detachment observations. The paper provides a valuable contribution to the ongoing discussion of the drivers, mechanics and possible consequences of glacier detachments. It is largely well written and easy to follow, and I believe that it should be published in NHSS after addressing the following points:

Reply: Thank you very much for your positive comments on our paper.

My first point of criticism is the hazard assessment, specifically the claim that the maximum runout distance of a potential glacier detachment is 1.3 km. The authors come to this conclusion using moderate friction parameters in a Voellmy-Salm model. However, a simple test using the mobility index *Fahrböschung* indicates that if KLP-37 were to detach in a manner similar to what has been observed at Aru, Flat Creek etc., the resulting mass flow could easily reach the railroad (*Fahrböschung* of 7-8°, based on my rough calculations). Kääh et al., 2020 show that *Fahrböschung* values for all known glacier detachments are between 5° and 10°.

Additionally, the hazard assessment was only carried out with one ice volume estimate that the authors state is likely conservative. I believe that the hazard assessment would benefit from being conducted with a range of starting volumes and upper boundaries. This, combined with a comparison of *Fahrböschung* values, would, I believe, paint a more honest picture of the hazard that glaciers like KLP-37 can pose, and therefore be of higher value to the scientific and hazard management community.

Finally, I was a bit surprised to find the entire hazard assessment in the Discussion section. I think it makes up a substantial enough part of the paper that it would deserve to be presented in the Methods and Results sections. Currently it comes as a bit of a surprise to the reader.

Reply: Thanks for the insightful comments and good suggestions.

We may indeed obtain a biased hazard assessment of possible avalanche by only using the Voellmy-Salm model with empirical parameters. Calculating the maximum runout distance using the mobility index *Fahrböschung* (i.e., angle of reach) is a good suggestion to provide an alternative hazard assessment. In the revised paper, we have provided runout estimates from both avalanche modeling and the mobility index *Fahrböschung*. Given the upper and lower bounds of *Fahrböschung* value (5°~10°) for low-angle glacier detachments suggested by Kääh et al. (2021), we have roughly estimated the runout distance of possible avalanches on KLP-37.

We have also adopted the suggestion of conducting a runout assessment by considering two avalanche scenarios with different source volumes. The first scenario assumes that the detachment starts from the transverse crevasses in the glacier accumulation region, whereas the second scenario assumes an avalanche of the glacier tongue. The avalanche volumes for the two scenarios were

estimated to be about  $27.06 \times 10^6$  and  $6.63 \times 10^6 \text{ m}^3$ , respectively. Given moderate friction parameters of the Voellmy-Salm model, we have found that the avalanche material of scenario #1 would reach the Qinghai-Tibet railway, while scenario #2 would not. The Fahrböschung values for the two avalanche scenarios were calculated to be both about  $9^\circ$ , laying in the range of  $5^\circ \sim 10^\circ$ .

Following the suggestions on the paper structure, we have moved the method description for hazard assessment into Section 3. The avalanching modeling results were moved to Section 4 in the revised paper.

My second point of concern are the surface flow velocity measurements. There is a discrepancy of two orders of magnitude between the terminus advance velocity and the surface flow velocities. No physical explanation that I can think of can justify such a difference. I suggest that this part of the analysis be redone, taking into account the uncertainties resulting from geolocation errors in the Planet data, and presented for the glacier and its surroundings.

Reply: Great suggestion. We have redone the cross-correlation processing using MicMac with multiple parameter combinations. We found that we can obtain a reasonable flow velocity estimate by specifying a privileged direction for regularization (i.e., the main flow direction) when doing the correlation. We have also verified the velocity estimate by implementing the image cross-correlation using the ImGRAFT software (Messerli & Grinsted, 2015). In the revised manuscript, we have updated the descriptions for the flow velocity of KLP-37. The velocity estimates for the surroundings of KLP-37 are also presented.

## Specific comments

**Title:** I suggest saying “Progressive advance and *detachment* hazard assessment ...”

Reply: Good suggestion! We have modified the title as suggested.

**L50:** “Specifically, increasing air temperatures, coupled with...”. Unclear whether you are intending this statement in a general sense or for specific cases (which ones?). Please clarify.

Reply: We have remove this unclear statement in the revised version.

**L53:** Geometry changes were also documented on Flat Creek glacier, as well as several other instances (refer to Kääh et al., 2020).

Reply: We have rewritten the sentence as follows “The detachments of several glaciers such as the Aru and Flat Creek glaciers were also preceded by geometry changes in the form of surge-like behaviors, although they were not known as surging before (Gilbert et al., 2018; Jacquemart et al., 2020).”

**L57:** “Recent glacier collapse events on the QTP”. Have there been more than the two at Aru? If yes, please specify, otherwise maybe just refer to the Aru cases specifically.

Reply: The sentence now reads: “The detachment of Aru glacier on the QTP have raised concerns on the stability of glaciers there, especially under intense climate warming.”

**L59+61:** “glacier instabilities” what kind of instabilities are you referring to here? Just glacier detachments or also ice avalanches, surges etc.? Maybe this can be formulated to be a bit more specific.

Reply: The “glacier instabilities” here include glacier detachments, glacier ice valances and surge

movements. We have rewritten the sentence as follows “While previous studies of glacier ice valances and surge movements in QTP mainly focus on the Karakorum and West Kunlun mountain regions where a large number of surge-type glaciers exist (Bhambri et al., 2020; Leinss et al., 2019; Yasuda and Furuya, 2015), little is known about glacier instabilities in the inner region of the plateau.”

**Figure 1:** It would be nice to show the location of the weather station in this first Figure. The caption suggest that the figure shows something about the geology, when in fact only the topography and the faults (‘seismic setting’?). That said, I think a geological overview would be well placed here since the authors later make a reference to fine grained rocks, but never describe the region’s geology. Such a description should be added to the Study Site section. Lastly, I am not sure the yellow dots (ice avalanches triggered by the 2001 EQ) add much information here, since they are never mentioned again.

Reply: We have added the weather station shown as a red square in Fig. 1. We have also added some sentences giving a geological overview of the study region in Section 2.1. The yellow dots (The ice avalanches triggered by the 2001 EQ) here indicate that the KLP-37 is located in a region that is venerable to seismic hazard, which was also mentioned in the discussion part, so we would like to keep the yellow dots in Figure 1.

**L104:** please clarify what you mean by “pre-collapse” event

Reply: Sorry for the unclear statement. We have replace the word “pre-collapse” to “ice avalanche”.

**L106:** since you just talked about both the east and the west branches in the previous sentence, it would be helpful to specify relative to which tongues the lakes are.

Reply: The sentence now reads “we can observe an ice-dammed glacier lake in front of the glacier’s east branch and a supraglacial pond on the west branch’s tongue surface.”

**L108:** “We can observe fine debris ...” how did you observe this? High resolution images are likely not enough to determine this adequately. If you have not had a chance to investigate in the field, a reference to the geology of the area (L110 “weak bedrock”) would be helpful.

Reply: We have removed the relevant sentence. We have cited a reference (see below) to show that the glacier likely lays on a weak bedrock.

Wu, X.H., Qian, F., and Pu Q.Y.: Quaternary Geology of the Eastern Kunlun Mountain, Symposium of Geology on Tibetan Plateau, pp. 1-18. Beijing: Geological Publishing House, 1982. (In Chinese)

**Figure 2:** In this caption, as well as somewhere in the text, please note (and possibly show) the distance between the glacier and the railroad. Also, please label what the yellow polygon indicates.

Reply: We have annotated the distance between the glacier and the railroad in Fig. 2. The yellow polygon indicates the outline of the tongue of the glacier’s west branch, which has been labeled in Fig. 2a.

**L133:** In this paragraph, it is not always clear which DEMs you made and which you just acquired. Did you generate any of the radar data based DEMs yourself (seems like they are all freely available products?). A little bit of clarification would be helpful here.

Reply: We have clarified that the SRTM and the HMA DEMs are freely available to the public, and the commercial TanDEM is provided by the German Aerospace Center under an academic license.

**L155:** define  $\partial t$

Reply: We have added that “ $\Delta t$  is the time span of the two images”.

**L157:** “which is set to zero because all the optical images used are orthorectified and georeferenced products” is not a satisfying reason for setting that value to zero. In my experience, orthorectified Planet images can exhibit a lot of jitter. Since you have your cross-correlation pipeline running in MicMac, you should be able to get an estimate of this value from the off-glacier cross correlation results.

Reply: Thank you for pointing out this. The sentence now reads: “ $\epsilon_{\text{geo}}$  is the relative georeferencing error between the two images, which is estimated from off-glacier cross correlation estimates”. We have also updated the uncertainty of the velocity estimate using Eq. (1) by considering the georeferencing error between two images.

**Figure 3:** The Nuth and Kääb approach for co-registering DEMs is pretty standard – the image could easily go into the supplementary material.

Reply: We have moved the Fig.3 into the supplementary material as suggested.

**L194:** I’m not sure that I agree with the authors approach to the applying single offsets here. In terms of snow penetration, if I had an estimate of penetration error with elevation, I think I would chose to correct it based on a fitting a curve to the data. The authors state that they are not interested in the high reaches of the glacier, but then show such results in Fig. 6. It would be interesting to see a bit more discussion of the effects of these error sources in the discussion. Do they significantly change the amount of thinning/thickening that we can see on the different parts of the glacier?

Reply: We have added a figure showing the elevation difference between the C-band and X-band DEMs over the KLP-37 glacier in the Supplementary file. It’s true that the penetration depth varies with the changes in elevation. Following the good suggestion, we have implemented a curve fitting to the elevation difference and then applied the correction.

We have also added some sentences in Section 4.2 to discuss the influence of penetration correction on the estimation of glacier thickness change.

**L215:** I don’t understand what you mean by “standard deviation of the mean elevation change of its elevation band”? Aren’t you just using the standard deviation of each elevation band (as indicated in equation 3?).

Reply: We have rewritten the sentence as follows “We assumed that the error for each pixel of elevation change ( $\epsilon_{\Delta h}^i$ ) is equal to the standard deviation of each elevation band”.

**L223:** Please add a reference to the least-squares fit ... isotropic variogram method, or describe in more detail.

Reply: We have added two references (i.e., Wang and Kääb, 2015; Magnússon et al., 2016) here.

**L231:** Why only three pairs? Processing all possible pairs would make your results more robust.

Reply: Following your suggestion, we have redone the image correlation of Planet images. We have shown correlation results for seven image pairs spanning between 2009 and 2020, with each image pair having a time span of about one year. The analysis and interpretation of the correlation results were also updated (Section 4.3).

**L251:** It is not clear to me what “The snowpack downstream of the crevasses collapsed” means. Was there an avalanche? Or just different snow conditions over a crevassed area? Or a change to the actual glacier ice? Please clarify this point.

Reply: Sorry for the unclear statement. The sentence now reads: “Satellite images show that the transverse crevasses in the glacier cirque had commenced in 1975 and became more evident in the following years (see the red arrows in Fig. S2). Specifically, the crevasses’ length and width increased apparently after 2013.”

**L254:** If it stayed unstable for four decades, does that mean it is actually stable? Clarify the point you are trying to make with this statement.

Reply: We have rewritten the sentence as follows “The extension of crevasses in the glacier accumulation region implies that the ice flow in the glacier upper region has recently become more dynamic”.

**Figure 4:** It is very hard to see much in this image, but there is a lot of empty space! I suggest rotating the image and making it 3x4 or 4x3 cells, so that it is easier to see something.

Reply: We have modified Fig. 4. Two Planet images acquired on 2020/08/29 and 2021/03/21 have also been added in Fig. 4. Note that the figure is numbered as Fig. 3 as we have moved the previous Fig. 3 into the supplementary file.

**L267:** Did you determine the uncertainties of the area in the same way that you did for the advance velocities, or some other method?

Reply: The lake was independently delineated five times, from which we estimated the uncertainty of the lake area. We have clarified this in the revised manuscript.

**Figure 5:** It would be really nice if each dot also had a horizontal bar that indicated over what time span the velocity was calculated.

Reply: Good suggestion. We have modified Figure 5 by adding a horizontal bar for each velocity estimate.

**L279:** Clarify that you DON’T mean that the velocities were similar between 2009–2015 and 2015–2019, but instead were stable during those periods, but then jumped between 2015 and 2016.

Reply: The sentence now reads: “The velocities were stable during the two periods 2009–2015 and 2015–2019, but jumped between 2015 and 2016.”

**Figure 6:** Please make the colorbars a little bit larger and use the same scale for each image (in which case you can get away with just one colorbar for each line of plots). It is very hard to interpret the changes when the scales change.

Reply: We have enlarged the colorbar of Fig.6 and set a same colorbar for all the sub-images.

**L295:** How much could this assessment be influenced by the radar penetration depths?

Reply: The KH-9–SRTM and SRTM–HMA10 DEM pairs are influenced by radar penetration depths. To infer how much the radar penetration depths will impact the elevation change estimates, we have calculated the elevation differences between the X-band and C-band SRTM over the 3×3 window and obtained a mean elevation difference of 2.44 m. Considering that we have applied a correction of 2.13 m (given the correction function  $y=0.0046 \times h - 21.5335$  and the mean elevation, 5145 m, of the window) to the SRTM DEM, a residual of 0.31 m would remain in the elevation change estimate. Thus, we infer that the elevation change errors due to SRTM penetration are about  $0.01 \text{ m}\cdot\text{a}^{-1}$  and  $0.03 \text{ m}\cdot\text{a}^{-1}$  for the KH-9–SRTM and SRTM–HMA10 DEM pairs, respectively.

**L298:** over the whole east branch? Or another window? Please clarify.

Reply: The mean elevation changes were calculated for the whole east branch. We have clarified this in the revised paper.

**L299:** did the east branch only thin or also retreat?

Reply: The east branch did not show retreat signal in the past 40 years. We have clarified this in the revised paper.

**L305:** I'm not sure I agree with the term *bulging* for what is described here (and depicted in Figure 7b): Bulging implies that there was an upward motion of ice surface, but really there is just advance of ice. The DEM difference is mostly against previously un-glacierized terrain, so obviously this appears as thickening in the DEM difference, but it does not reflect thickening of ice in a place where there was ice previously. That said, I do see bulging Figure 6, but am having a hard time finding that in the cross-section.

Reply: The word “bulging” here indeed may lead to misunderstanding. We have replaced “bulging” in Fig.7b with “Increasing elevation”. We also modify the relevant sentences in the text to avoid the use of “bulging” to indicate elevation increasing due to the advance of glacier toward the place where there was no ice previously.

**L306:** What makes it not a surge, but only surge-like? This could be an interesting topic to elaborate on in the discussion.

Reply: Surge-type glaciers periodically alternate between long periods of slow flow (the quiescent phase) and short periods of fast flow (the surge phase). Surging yields down-glacier transport of mass and often results in large and sudden glacier advances. Here we use the word “surge-like” because the flow velocity of KLP-37 shown an abrupt increase during 2015 and 2016. This kind of flow behavior resembles the surging movement of surge-type glaciers, which has also been reported on the Aru or Amney Machen glaciers in Tibet Plateau. However, we cannot conclude that the KLP-37 glacier is a surge-type because we have not captured the periodical surge advance signal. We have elaborate on this in the revised text (Section 4.2).

**Figure 7 :** Can you indicate the years next to the different DEMs? That would help interpret the changes. Then, it would be nice if the colors were on a gradient scale along age, so that it is visually clear which way the changes progressed.

Reply: Good suggestion. We have modified Fig. 7 in the revised paper by adding the timespan for each DEM pair and by changing the color scale for each profile.

**Figure 8:** Because the x-axis runs from upglacier to downglacier in the previous plots, I think it would be beneficial to flip the x-axis in this plot (so that higher elevations are on the left and lower elevations are on the right).

Reply: Good suggestion. We have modified Fig.8 as suggested.

**L334:** Over what area where these maximum velocities measured? Single points?

Reply: The maximum velocity over each period represents the maximum value within the glacier tongue area, and the value was measured on one point (pixel). We have clarified this in the revised version.

**Figure 9:** Please use colorbars that are not divergent (the blue to white to red implies that blue has an opposite signal to the red) but rather continuous, and use the same scale in each plot. Additionally, it would be very nice to see the velocities outside the glacier as well. Is there actually enough accuracy

to distinguish the glacier from the surrounding landscape? Lastly, you keep referring to the 4800m elevation line, so it would be very nice to show that line in the plots.

Reply: We have changed the colorbar of Fig. 9 to a convergent one. The velocities outside the glacier were illustrated as well. It can be seen from Fig. 9 that the flow of the glacier can be well distinguished from the surrounding area, especially at the glacier front region. We also added the elevation contour line of 4800 m in the revised version.

**L349:** Your surface flow velocities and terminus advance velocity differ by two orders of magnitude. I don't see the explanations you offer as plausible, but suspect an error in the processing of the cross-correlation.

Reply: Thanks a lot for pointing out this. We have checked the cross-correlation processing and found that we indeed set up improper parameters for image correlation in the MicMac software. We have redone the image cross-correlation with the Planet images and cross-checked the correlation results with ImGRAFT software (Messerli & Grinsted, 2015). We have updated the velocity maps and the relevant analysis in the revised paper (see Section 4.3).

Messerli, A. and Grinsted, A.: Image georectification and feature tracking toolbox: ImGRAFT, *Geosci. Instrum. Method. Data Syst.*, 4, 23–34, 2015. doi: 10.5194/gi-4-23-2015

**L370:** How did you (or Wu et al?) determine the lower permafrost altitude in the field? It would also be good to take a look at the two global permafrost maps (Gruber et al., 2012, Obu et al., 2019), and reference those.

Reply: Wu et al. (2005) used a 50-MHz ground-penetrating radar to detect the boundary of permafrost in the study region, and they interpreted the lower limit of permafrost from nine radar profiles to determine the boundary between the permafrost and non-permafrost region. We also checked the permafrost map based on TTOP modeling (Obu et al. 2019), and found that the permafrost probability value over the KLP-37 glacier tongue region is 1. We have clarified a bit on the lower permafrost altitude of the study area in the revised paper.

**L374:** If my memory serves me correctly, Leñas glacier was deemed temperate... but I think something similar was found at Flat Creek. Maybe double check the references?

Reply: From the prolonged preservation of the collapse deposits on the Leñas glacier, Falaschi et al., (2019) suggested a potentially cold ground temperature regime for parts of the Leñas glacier and forefield. For the Flat Creek glacier, Jacquemart et al. (2020) concluded that it was polythermal, with a thin cold-ice tongue. We have added some clarifications in the revised version.

**L379:** The statement that the ice-dammed lake exerts a hydrological influence on the glacier tongue needs to be backed up significantly. What kind of influence? This seems like it contradicts the cold-ice edge that is keeping the lake locked in. If the lake has not decreased in size, I don't see how it could influence the dynamics of the glacier in any substantial way.

Reply: We have removed the relevant statement in the revised paper.

**L384:** I don't understand what you mean by "deflection region"

Reply: Sorry for unclear description. The "deflection region" represent the place where the flow direction of the glacier changes. We have rewritten sentence for clarity in the revised paper.

**L386:** It seems to me that the narrowing of the topography which kind of "pinches" the glacier tongue would help stabilize it, rather than making it unstable. Please clarify how you think this factor

contributes to a destabilization.

Reply: The topography of the KLP-37 glacier contributes to destabilization from two aspects. First, the ice flow direction changes at the elevation of 4850 m due to the local topography. Therefore, large ice masses accumulate above 4850 m, and the driving pressure thus increases. Second, the slope angle is about  $\sim 10^\circ$  above 4850 m but increases to  $\sim 20^\circ$  at the lower place. The steep topography provides a preconditioning factor for the unstable status of the glacier tongue. We have clarified these two aspects in the revised paper.

**Figure 11:** Why are you only showing summer temperatures? At what elevation are these temperatures? The current graph does not support your claim that the area is in permafrost.

Reply: We have modified the figure and shown mean annual air temperature instead of mean summer temperature at the Wudaoliang meteorological station. The elevation of the weather station is 4613 m, which has been remarked in the paper.

**L395:** I am a bit hesitant about this interpretation of the influence of temperature and precipitation on the flow speeds. Firstly, what exactly are you referring to by “flow velocity”? The advance of the glacier tongue or the mapped velocities on all of the tongue? This needs to be clarified. For the advance of the glacier tongue, the change really just happened between 2015 and 2016, but was likely the result of accumulation that happened further upstream in the years before. Please elaborate on these points.

Reply: We have clarified in the revised paper that the “flow velocity” refers to the mapped velocities on all of the tongue.

The interpretation of snout advance velocities and the updated velocity maps indicates that the flow velocity has abruptly increased between 2015 and 2016. We agree that the abrupt velocity increase between 2015 and 2016 could likely be the result of accumulation that happened further upstream in the years before. We have also observed slight accelerations of ice flow during 2009–2013 and 2016–2020. We thus suggest that the climate warming in the study region could also contribute the long-term acceleration. We have elaborated on the factors that may contribute to the flow acceleration in the revised paper.

**Figure 12:** Why are you only considering the tongue in your hazard assessment? The crevasses seem to be much higher on the glacier, and the situation at Aru showed that that was where the detachment initiated. At the very least, I believe that it would be valuable to run the model with the two endmember volumes.

Reply: Thank you very much for your good suggestion. We have presented avalanche modeling including two scenarios with different source volumes.

**L435:** Can you get that much advance by just internal deformation? I don't know the answer, but feeling like there might have to be some sliding, at least in the fastest parts.

Reply: From the updated flow velocity maps, we agree that a sliding surface should be partly responsible for the fast and homogenous flow in the front part of the glacier. We have clarified this in the revised paper.

**L458:** I don't see how the current glacier flow velocities/basal friction parameters influence how far the mass flow resulting from a glacier detachment can travel. If the entire thing detaches, basal friction decreases to essentially nothing, and that is what determines the runout distance.



Reply: We agree that it is unreasonable to link the current glacier flow velocity to possible runout distance of a glacier. We have removed the relevant statement.

**L461:** I am not convinced by your justification for selecting the moderate friction parameters. I am not sure exactly what findings you are referring to with reference to the Allen 2009 paper, but until very recently, we had hardly heard about glacier detachments, and it is unlikely that a comprehensive assessment of basal friction values was published over 10 years ago. Furthermore, I am not aware of any findings that link the basal shear stress during regular glacier flow to the runout distances of glacier detachments, most certainly not for making a difference between surging and non-surging glaciers. Please clarify substantially.

Reply: Here we try to use the Voellmy-Salm model to investigate the runout distance of potential detachment on KLP-37. Selecting proper friction parameters (i.e., coulomb-type friction  $\mu$  and turbulent friction  $\xi$ ) is critical for running the simulation. Because it is impossible to obtain these friction parameters directly, we empirically determine the ranges of  $\mu$  and  $\xi$  from previous studies. Although the assessments of these friction values for glacier detachment events are rare, simulations of previous ice/rock avalanches using the VS model can give us clues.

Allen et al. (2009) implemented VS modeling to reconstruct past eight ice/rock avalanche events from different glacial environments and summarized the best-fit friction parameters that can obtain flow paths fitting well with realities. The eight simulated events include unequal fractions of ice and water content and extremely variable topography. The best-fit values of  $\mu$  and  $\xi$  for these events range between 0.05~0.2 and 1000~4000  $\text{m}\cdot\text{s}^{-2}$ , respectively. Retrospective analyses of a few glacier detachment events have also revealed friction parameters laying in the above ranges. For example, the best-fit  $\mu$  for the first and second Aru glacier detachments are 0.11 and 0.14 (Kääb et al., 2018); The 2002 Kolka detachment has best-fit values of 0.05 and 2700  $\text{m}\cdot\text{s}^{-2}$  for  $\mu$  and  $\xi$ , respectively (Allen et al. 2009).

We have clarified why we chose the moderate friction parameters 0.15 and 2500  $\text{m}\cdot\text{s}^{-2}$  for the VS modeling in the revised paper. We have also compared the runout distance from VS modeling with the simple calculation from the angle of reach (“Fahrböschung”) (Kääb et al., 2021). We have removed the statement that relates glacier flow velocity to possible runout distance estimate.

**L474:** I don’t understand what you mean by “experiencing ice-rock collapses”?

Reply: The sentences now reads :“Although plenty of glaciers in QTP have been retreating in the last several decades, glacier advancing has been ubiquitously observed either on surge-type glaciers or on those where ice-rock detachments have occurred”.

**L475:** I don’t follow how Kääb 2020 suggest that any glacier advance is an indicator for a glacier instability (though I suppose this depends on how you define glacier instability – not all are hazardous).

Reply: To avoid misunderstanding, we have rewritten the sentence and now it reads “Kääb et al. (2021) suggested that glacier detachments could be seen as extreme endmembers of the range of surge-type and surge-like glacier instabilities (2020), supported by the fact that many of glacier detachments exhibited surge-like advance ahead of the failures or occurred on surge-type glaciers.”

**L481:** Please back up the statement of “the ice-dammed lake influencing the dynamics of the glacier tongue of the west branch”. This is currently not supported by any of the data, nor has any relationship between the two been mentioned prior to this.

Reply: We have deleted the relevant statements.

**L487:** Please back up the statement “was transported from the upper region by a historical seismic event”. How did you determine this to be a logical possibility? Is there evidence of something like this elsewhere in the region? So far, we have not seen earthquakes causing detachments of low-angle valley glaciers... (not saying it’s not possible though...).

Reply: Thanks a lot for your reminder. We have deleted the relevant statements since we do not have any solid evidence.

**L492:** In addition to ground based InSAR, optical camera based systems are probably cheaper and similarly effective, if it’s just for monitoring.

Reply: The sentence has been modified to “In the future, monitoring techniques with short temporal sampling rates such as ground-based SAR and optical camera-based systems should be employed to capture the transient or accelerating signals of surface motion”.

**L494:** I don’t understand what you mean by saying “our simulations provide an alternative solution for assessing the hazard of an impending glacier collapse”. Alternative to what? Is the glacier detachment impending, or just a possibility (I would argue that it is probably more likely that nothing will happen).

Reply: We have revised the sentence to make it more clear, and now it reads: “Our simulations of the runout extent using avalanche modeling, combined with the empirical estimates of runout distance using the angle of reach, provide a preliminary assessment of the hazard influence of a potential glacier detachment.”

### Technical corrections

Terminology: Over recent months, the term *glacier detachment* seems to have become the term of choice for describing the catastrophic detachment of low-angle valley glaciers. Rather than using the somewhat fuzzy term “collapse”, which is frequently used for rock avalanches, slope failures etc., I recommend changing the terminology to glacier detachment throughout the manuscript. Example: Due to hazardous threats of glacier ~~collapse~~ detachments to ... (Line 37).

Reply: We have changed the terminology “glacier collapse” to “glacier detachment” throughout the manuscript.

Use of tenses: There are quite a few improper uses of past tenses. I have noted these below where I caught them, but am likely to have missed a few. In general, I suggest to put anything that the authors have done in the past tense. Example: We chose a set of parameters, we analyzed these images etc.

Reply: Thanks a lot for the reminder. We have checked the tenses for verbs throughout the paper.

If your line numbers have changed, I also have these edits in a document (hand written). Please let me know via the editorial office if having this document would be helpful.

L26: *tripled* not *trebled* ; L39: *glacier* not *glacial*; L40: *was* not *have*; L41: *was* not *is*; L46: *two* not *twice*; L46: remove *the lower parts* → the entire glacier was implicated in 2015; L53: *on* or *from* not *in*; L59: *mean global rate*, not *global mean rate*; L67: ...*identified* the glacier, *which is* close to ...; L68: intense *crevassing* on the glacier surface *raised* the question *whether* a hazardous ice avalanche *might be* imminent.; L71: *past* not *recent* L75: *discuss* not *discussed*; L76: *estimate* not

estimated; L77: *occurred* not occurs; *discuss* not discussed;

Reply: Corrected.

L104: the west branch's *terminus lies about 220m lower* (Fig. 2a); remove "Particularly"

Reply: Done.

L112: *overlayed* not overlapped; *The* ice-dammed lake and supraglacial pond are also *shown*.

Reply: Done.

L118: Why are Table 1 and Table 2 shown at the end of the document? It would be much nicer to have them where they are referenced.

Reply: We have placed the Table 1 and Table 2 into the main text.

L121: I would say that glacier changes are *often* mapped on Landsat etc. images (partly bc for decades that is the best we had) and that they have a *resolution of 10-30m*.

Reply: The sentence now reads: "Glaciers changes are often mapped on the freely available Landsat, Sentinel-2, and ASTER satellite images, which commonly have a resolution of 10–30 m (Bolch et al., 2011; Scherler et al., 2011)."

L123: *used* (if you got it free) or *acquired* (if you bought the images) not "collected" (collected is used primarily for data collection that you do in the field). This comes up several times in the manuscript.

Reply: We have replaced the word "collect" to "use" or "acquire" according the suggestion.

L127: Just say ...*spy satellite to reconstruct the topography of KLP-37 in 1975*.

Reply: Done.

L161: *generate DEMs from KH-9 stereo images*

Reply: Done.

L177: *to a spatial posting of*; The DEM pairs *need* to be ...

Reply: Done.

L185: *posting* or *resolution* not post

Reply: Done.

L196: odd use of while

Reply: We have remove the sentence containing the word "while".

L200: similar to ~~the~~ previous

Reply: Done.

L248: insert space after KH-9; *past* instead of recent

Reply: Done

L249: *A time-lapse* of optical images ...

Reply: Done

L251: Remove "KH-9 image" since the crevassing didn't happen in the image, but rather in the world. The images just show it.

Reply: Done

L262: *is* instead of *were*

Reply: Done.

L277: *the past* instead of *recent*

Reply: Done.

L278: *and* instead of *while*; *rose to more* instead of *had been higher*

Reply: Done.

L341: *tripled* not *trebled*

Reply: Done.

L350: remove one *not*

Reply: Done.

L360: *advanced continuously* instead of “*had been progressively advancing*”

Reply: Done.

L361: *accelerated* instead of *was accelerating*

Reply: Done.

L362: remove *temporal*

Reply: Done.

L363: ...conditions of *the glacier*, topography ...

Reply: Done.

L371: *terminus* instead of *termini*

Reply: Done.

L377: ... crevasses *to reach the* sliding surface ...

Reply: Done.

L403: *dense* is an odd choice of word here – what do you mean?

Reply: We have replaced the word “*dense precipitation*” to “*heavy precipitation*”.

L403: *was* instead of “*has been*”; I don’t understand what you mean by “*within 40 days before*”? 40 days prior? Or during the 40 days prior? Or up to 40 days prior?

Reply: We have rewritten the sentence as follows “*Specifically, heavy precipitation accounting for about 90% of the total precipitation of 2016 was recorded during the 40 days prior to the Aru glacier collapse*”.

L501: with *a total* advance instead of “*with an accumulative distance*”

Reply: Done.
